# Supplementary material
Source: Springer Nature journal article supplement (https://www.springermedizin.de/resource/supplementary/12875_2011_573_MOESM1_ESM.pdf/9434972)
Supplement: MOESM1 [file 9434972]

- **Service charitably funded for one year**
- **GP partners consulted on service requirements**
- **Need at GP practice for MSK services, in terms of services on offer and shorter waiting times than were available for the physiotherapy service**
- **Lead GP on Steering Group**
- **Recruitment of experienced CAM practitioners**
- **GPs completed referral forms stored on main Practice server**
- **Regular meetings between CAM practitioners**
- **CAM practitioners recorded clinical session notes on computerised EMIS system used by the whole Practice team**
- **Action research elements of the evaluation fed back into service delivery**
